# Supplementary material
Source: Springer Nature journal article supplement (https://www.springermedizin.de/resource/supplementary/12876_2011_777_MOESM1_ESM.pdf/9437764)

**Additional file 1**

**5 days**

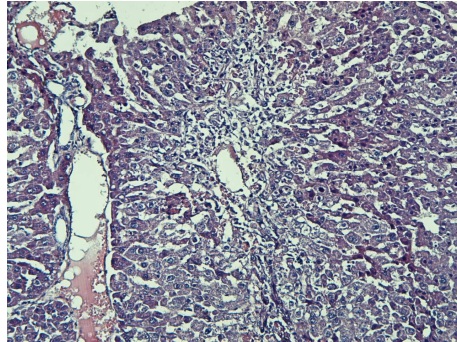

**8 days**

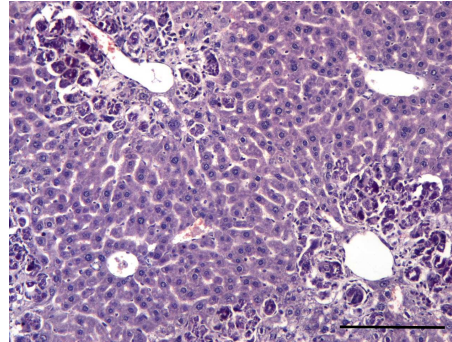

Supplement: MOESM1 [file 9437764]
